# Supplementary material for: Genome-Wide Assessment of Outer Membrane Vesicle Production in Escherichia coli
Source: PubMed Central journal article supplement (PMC4583269; doi:10.1371/journal.pone.0139200), 2015-09-25
Supplement: pone.0139200.s001.pdf [file pone.0139200.s001.pdf]

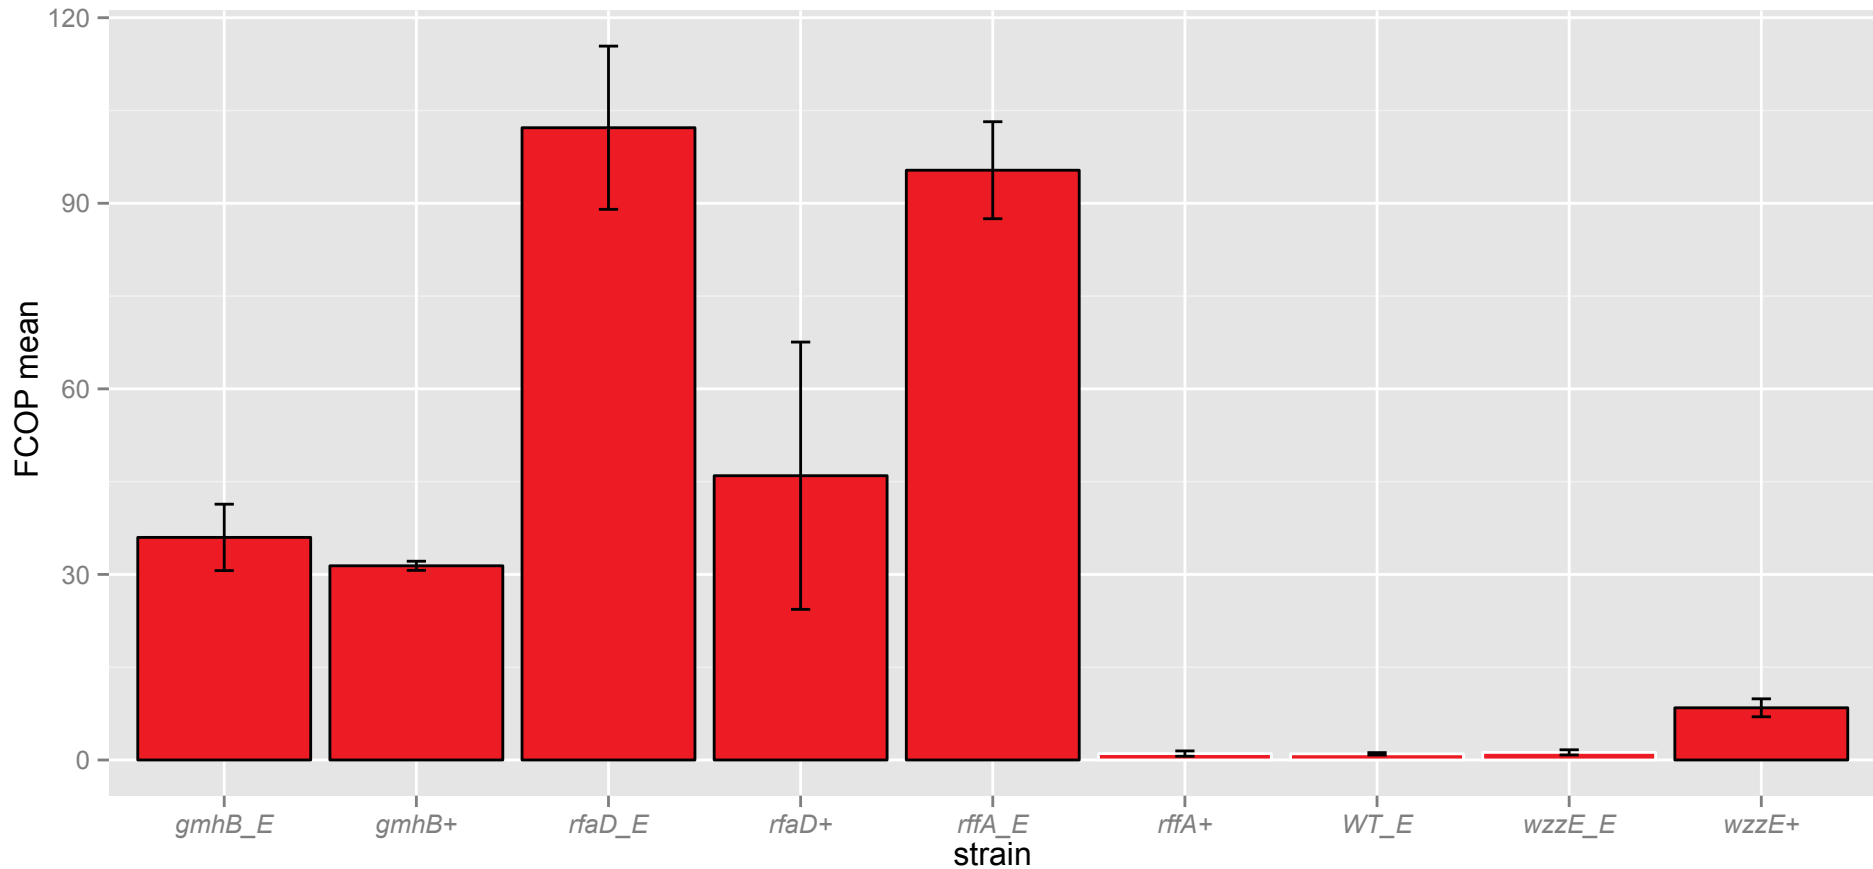

Supplementary Figure S1. Complementation of vesiculation mutants. Each bar represents the average of at least three independent trials of FCOP vesiculation measurements normalized to wild type vesiculation and cell numbers. “\_E”, mutant with empty vector; “+”, mutant with complementing gene expressed in trans from a plasmid. Plasmids were obtained from the ASKA collection (Kitagawa et al., 2006, DNA Research, 12(5): 291-299). Plasmid-bearing strains were grown according to recommendations in Kitagawa et al., except that expression was not induced with IPTG.
