# Supplementary material for: Genome-Wide Assessment of Outer Membrane Vesicle Production in Escherichia coli
Source: PLoS One. 2015 Sep 25;10(9):e0139200. doi: 10.1371/journal.pone.0139200 (PMC4583269; doi:10.1371/journal.pone.0139200)
Supplement: S5 Table — (XLSX) [file pone.0139200.s006.xlsx]

## Sheet: legend
Supplementary Table S5. Genes comprising enriched GO categories listed in main text Table 1.
Column	Description
UniProtID	UniProt database unique gene identifier
gene.name	Four-letter common name for each gene
GO.category.ID	Unique identifier for each GO category. Note that some functional categories contain more than one GO ID
evidence.code	Evidence for GO annotation: see http://geneontology.org/page/guide-go-evidence-codes for abbreviation meanings
annotation	Function of encoded protein
other.names	Gene synonyms
functional category	Enriched category to which each gene belongs. Categories match those listed in Table 1.

## Sheet: Table S5
UniProtID	gene.name	GO.category.ID	evidence.code	annotation	other.names	functional category
P63228	gmhB	GO:0097171	IEA	D,D-heptose 1,7-bisphosphate phosphatase	gmhB|yaeD|b0200|ECK0200	ADP-L-glycero-manno-heptose biosynthesis
P67910	rfaD	GO:0097171	IEA	ADP-L-glycero-D-mannoheptose-6-epimerase	rfaD|waaD|hldD|htrM|nbsB|b3619|ECK3609	ADP-L-glycero-manno-heptose biosynthesis
P76658	rfaE	GO:0097171	IEA	fused heptose 7-phosphate kinase/heptose 1-phosphate adenyltransferase	rfaE|yqiF|hldE|gmhC|waaE|b3052|ECK3042	ADP-L-glycero-manno-heptose biosynthesis
P0AC84	gloB	GO:0006750	IEA	glyoxalase II	gloB|yafR|b0212|ECK0212	glutathione biosynthesis
P06715	gor	GO:0006749	IEA	glutathione reductase (NADPH)	gor|gorA|b3500|ECK3485	glutathione biosynthesis
P04425	gshB	GO:0004363	IEA	glutathione synthetase monomer	gshB|gsh-II|b2947|ECK2942	glutathione biosynthesis
P24175	cpsG	GO:0009103	IEA	phosphomannomutase	cpsG|rfbK|manB|b2048|ECK2042	LPS biosynthesis
P63228	gmhB	GO:0009244	IEA	D,D-heptose 1,7-bisphosphate phosphatase	gmhB|yaeD|b0200|ECK0200	LPS biosynthesis
P17115	gutQ	GO:0019294	IMP	D-arabinose 5-phosphate isomerase	gutQ|srlQ|b2708|ECK2703	LPS biosynthesis
P63224	lpcA	GO:0009244	IEA	D-sedoheptulose 7-phosphate isomerase	lpcA|isn(H.i.)|yafI|gmhA|tfrA|b0222|ECK0223	LPS biosynthesis
P0ACV0	lpxL	GO:0009103	IEA	lauroyl acyltransferase	lpxL|htrB|waaM|b1054|ECK1039	LPS biosynthesis
P24205	lpxM	GO:0009103	IEA	myristoyl-acyl carrier protein (ACP)-dependent acyltransferase	lpxM|mlt|waaN|msbB|b1855|ECK1856	LPS biosynthesis
P67910	rfaD	GO:0009244	IMP	ADP-L-glycero-D-mannoheptose-6-epimerase	rfaD|waaD|hldD|htrM|nbsB|b3619|ECK3609	LPS biosynthesis
P76658	rfaE	GO:0009103	IEA	fused heptose 7-phosphate kinase/heptose 1-phosphate adenyltransferase	rfaE|yqiF|hldE|gmhC|waaE|b3052|ECK3042	LPS biosynthesis
P27833	rffA	GO:0009243	IEA	dTDP-4-dehydro-6-deoxy-D-glucose transaminase	rffA|rff|fcnA|wecE|yifI|b3791|ECK3783	LPS biosynthesis
P27832	rffC	GO:0009243	IEA	dTDP-fucosamine acetyltransferase	rffC|rff|wecD|yifH|b3790|ECK3782	LPS biosynthesis
P24173	waaC	GO:0009103	IEA	ADP-heptose:LPS heptosyltransferase I	waaC|rfa-2|rfaC|yibC|b3621|ECK3611	LPS biosynthesis
P25740	waaG	GO:0008919	IDA	lipopolysaccharide glucosyltransferase I	waaG|rfaG|b3631|ECK3621	LPS biosynthesis
P27128	waaO	GO:0008918	IEA	UDP-D-glucose:(glucosyl)LPS alpha-1,3-glucosyltransferase	waaO|waaI|rfaI|b3627|ECK3617	LPS biosynthesis
P71241	wcaJ	GO:0009103	IEA	predicted colanic acid biosynthsis UDP-glucose lipid carrier transferase	wcaJ|b2047|ECK2041	LPS biosynthesis
P0AG00	wzzE	GO:0009103	IEA	Enterobacterial Common Antigen (ECA) polysaccharide chain length modulation protein	wzzE|metNSt|wzz|yifC|b3785|ECK3777	LPS biosynthesis
P0AE08	ahpC	GO:0033194	IMP	alkyl hydroperoxide reductase, AhpC component	ahpC|tpx|ssi8|b0605|ECK0599	oxidative stress response
P0AEN1	fre	GO:0006979	IMP	riboflavin reductase / FMN reductase	fre|fadI|flrD|fsrC|lux|b3844|ECK3836	oxidative stress response
P37689	gpmM	GO:0006979	IMP	2,3-bisphosphoglycerate-independent phosphoglycerate mutase	gpmM|gpmC|pgmI|gpmI|yibO|b3612|ECK3602	oxidative stress response
P21179	katE	GO:0006979	IMP	catalase II	katE|b1732|ECK1730	oxidative stress response
P13029	katG	GO:0070301	IEP	hydroperoxidase I	katG|b3942|ECK3934	oxidative stress response
P0A9P0	lpd	GO:0006979	IMP	E3 monomer	lpd|dhl|lpdA|b0116|ECK0115	oxidative stress response
P0A769	mntH	GO:0034599	IGI	Mn(2+) / Fe(2+): H+ symporter MntH	mntH|mntA|yfeP|b2392|ECK2387	oxidative stress response
P0ACQ4	oxyR	GO:0006979	IDA	OxyR DNA-binding transcriptional dual regulator	oxyR|momR|mor|b3961|ECK3953	oxidative stress response
